## P402

**An exceptionally rare cause of myocardial ischemia: a case report**

Montini O.<sup>1</sup>; Moscatelli S.<sup>2</sup>; Nardi B.<sup>3</sup>; La Canna G.<sup>3</sup>; Indolfi E.<sup>3</sup>; Fazzari F.<sup>3</sup>; Scarfo I.<sup>3</sup>; Torracca L.<sup>3</sup>; Monti L.<sup>3</sup>

<sup>1</sup>Università degli studi di Milano-Bicocca, milano, Italy

<sup>2</sup>University of Genoa, Cardiology Department, San Martino Hospital, Genoa, Italy

<sup>3</sup>Istituto Clinico Humanitas, Milan, Italy

**Introduction:** Paragangliomas are rare, slow-growing tumors derived from neural crest cells. Paragangliomas may exhibit locally invasive behavior or metastatic disease. Few cases of paragangliomas located in the pericardium are reported. We describe a case of pericardial paraganglioma followed-up with cardiac MR for 7 years, until it caused coronary artery compression and myocardial ischemia.

**Case report:** A 35-year-old woman with a history of partial resection of latero-cervical paraganglioma (positive for SDHB mutation-c.744C>G) treated with radiometabolic radiotherapy, was referred to our Hospital for characterization of an increased Gallium signal on PET-TC at the level of left atrial appendage.

The patient underwent Cardiac Magnetic Resonance (CMR) (panel A), which documented a well-defined, highly vascular, paraaortic, intrapericardial mass between the aortic bulb and the pulmonary artery. MR signal was hyperintense on T2 STIR, hypointense on T1 and with scarce, inhomogeneous LGE with a fibrotic labrum suggesting a possible myocardial relapse of paraganglioma.

CMR 5 and 7 years follow-up (panel B-C) showed an increase in mass diameter with initial compression of the left Valsalva sinus, superiorly to the left main/ LAD artery and inferiorly to the proximal portion of the common trunk of the pulmonary artery.

Stress-EKG was positive for ST elevation in aVR with diffuse ST depression (II, III, aVF, V4-5-6) suggesting inducible ischemia due to mass compression. Coronary angiography showed normal coronary arteries.

The patient underwent successful resection of the mass (Panel D). Histology confirmed the diagnosis of extra-suprarenal paraganglioma, with no vascular invasion: hematoxylin and eosin staining showed a well-defined nest of cuboidal cells; immunohistochemistry was strongly positive for chromogranin A and synaptophysin and negative for cytokeratins, excluding a carcinoid tumor.

**Conclusion:** Intrapericardial paragangliomas are slowly growing masses; they have the capability to infiltrate or compress the coronary arteries: in this case a paraganglioma caused inducible myocardial ischemia.

CMR is ideal for depicting the site, signal and dimension of these rare intrapericardial tumors. In case of masses adjacent to the aortic root, a stress test can help the clinical management.

Abstract P402 Figure.

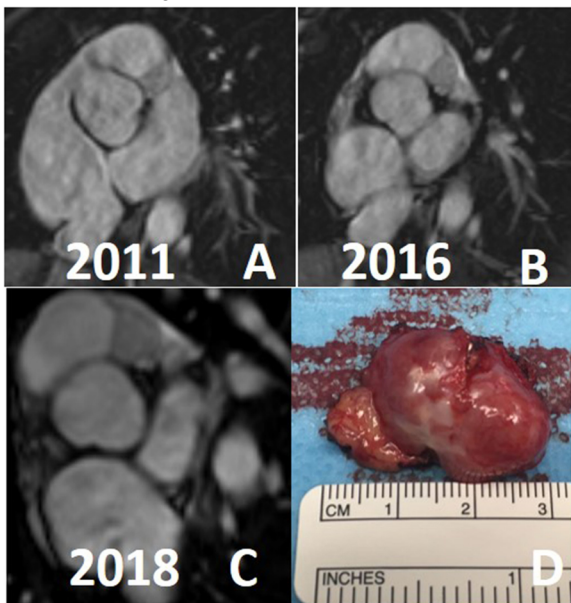

Source: http://academic.oup.com/ehjcimaging/article-pdf/20/Supplement_2/jez109.041/28764664/jez109.041.pdf
